# Supplementary material for: Clinical Effects of the Extract of the Seeds of the Indian Celery—Apium graveolens—In Horses Affected by Chronic Osteoarthritis
Source: MDPI journal article supplement (doi:10.3390/ani9080585), 2019-08-20
Supplement: s1 [file s1]

**CLINICAL SHEET FOR THE VETERINARY PRACTITIONERS**  
**VISITING THE HORSES PARTICIPATING IN THE CSE TRIAL**

|               |             |     |             |                 |
|---------------|-------------|-----|-------------|-----------------|
| <b>HORSE:</b> |             |     | <b>SEX</b>  | <b>ATTITUDE</b> |
| BREED         | COAT COLOUR | AGE | DESIGNATION | N° MICROCHIP    |

**GENERAL OBJECTIVE EXAMINATION (GOE)**

|                                                                                 |
|---------------------------------------------------------------------------------|
| <b>TEGUMENTARY EXAMINATION (scars, excoriations, wounds, swelling, etc ...)</b> |
| LEFT FORE LIMB                                                                  |
| RIGHT FORE LIMB                                                                 |
| LEFT HIND LIMB                                                                  |
| RIGHT HIND LIMB                                                                 |
| OTHER                                                                           |

|                                       |
|---------------------------------------|
| <b>RESPIRATORY SYSTEM EXAMINATION</b> |
| note:                                 |

|                                            |
|--------------------------------------------|
| <b>CARDIOCIRCULATORY SYSTEM EVALUATION</b> |
| note:                                      |

**PARTICULAR OBJECTIVE EXAMINATION OF THE LOCOMOTOR APPARATUS (POELA)**

|                  |                 |
|------------------|-----------------|
| PERPENDICULARITY | LEFT FORE LIMB  |
|                  | RIGHT FORE LIMB |
|                  | LEFT HIND LIMB  |
|                  | RIGHT HIND LIMB |

|                |                 |                               |      |
|----------------|-----------------|-------------------------------|------|
| FEET PALPATION | LEFT FORE LIMB  | SENSITIVITY (NO; +; ++; +++): | AREA |
|                | RIGHT FORE LIMB | SENSITIVITY (NO; +; ++; +++): | AREA |
|                | LEFT HIND LIMB  | SENSITIVITY (NO; +; ++; +++): | AREA |
|                | RIGHT HIND LIMB | SENSITIVITY (NO; +; ++; +++): | AREA |

|                 |                 |                                |                               |
|-----------------|-----------------|--------------------------------|-------------------------------|
| PASSIVE FLEXION | LEFT FORE LIMB  | AMPLITUDE (OK; -; - -; - - -): | SENSITIVITY (NO; +; ++; +++): |
|                 | RIGHT FORE LIMB | AMPLITUDE (OK; -; - -; - - -): | SENSITIVITY (NO; +; ++; +++): |
|                 | LEFT HIND LIMB  | AMPLITUDE (OK; -; - -; - - -): | SENSITIVITY (NO; +; ++; +++): |
|                 | RIGHT HIND LIMB | AMPLITUDE (OK; -; - -; - - -): | SENSITIVITY (NO; +; ++; +++): |

|                    |                         |  |                      |                       |                      |                       |
|--------------------|-------------------------|--|----------------------|-----------------------|----------------------|-----------------------|
| EVALUATION OF GAIT | STRAIGHT WALK           |  | LEFT FORE LIMB<br>/5 | RIGHT FORE LIMB<br>/5 | LEFT HIND LIMB<br>/5 | RIGHT HIND LIMB<br>/5 |
|                    | STRAIGHT TROT           |  | LEFT FORE LIMB<br>/5 | RIGHT FORE LIMB<br>/5 | LEFT HIND LIMB<br>/5 | RIGHT HIND LIMB<br>/5 |
|                    | COUNTER TROT LEFT HAND  |  | LEFT FORE LIMB<br>/5 | RIGHT FORE LIMB<br>/5 | LEFT HIND LIMB<br>/5 | RIGHT HIND LIMB<br>/5 |
|                    | COUNTER TROT RIGHT HAND |  | LEFT FORE LIMB<br>/5 | RIGHT FORE LIMB<br>/5 | LEFT HIND LIMB<br>/5 | RIGHT HIND LIMB<br>/5 |
|                    | FLEXION TEST            |  | LEFT FORE LIMB<br>/5 | RIGHT FORE LIMB<br>/5 | LEFT HIND LIMB<br>/5 | RIGHT HIND LIMB<br>/5 |
