# Supplementary material for: Clinical Effects of the Extract of the Seeds of the Indian Celery—Apium graveolens—In Horses Affected by Chronic Osteoarthritis
Source: MDPI journal article supplement (doi:10.3390/ani9080585), 2019-08-20
Supplement: s1 [file s1]

**FOLLOW UP (Trainer, Owner)**

|                     |
|---------------------|
| <b>HORSE:</b>       |
| <b>SEX:</b>         |
| <b>ATTITUDE:</b>    |
| <b>AGE (YEARS):</b> |

|                                                                                        |     |    |
|----------------------------------------------------------------------------------------|-----|----|
| The subject willingly takes the product:                                               | YES | NO |
| The subject regularly takes the product:                                               | YES | NO |
| There have been variations in physiological functions:                                 | YES | NO |
| You have noticed some changes / attitudes in the subject since he took the supplement: | YES | NO |
| The animal is always alert and is not reluctant to move:                               | YES | NO |
| There are obvious signs of sweating:                                                   | YES | NO |

|                                                                |     |    |
|----------------------------------------------------------------|-----|----|
|                                                                |     |    |
| The gait is regular:                                           | YES | NO |
| The riding gait is regular:                                    | YES | NO |
| You noted the appearance of areas of pain (neck, back, limbs): | YES | NO |
| NOTES:                                                         |     |    |
