# Supplementary material for: Clinical Effects of the Extract of the Seeds of the Indian Celery—Apium graveolens—In Horses Affected by Chronic Osteoarthritis
Source: Animals (Basel). 2019 Aug 20;9(8):585. doi: 10.3390/ani9080585 (PMC6720213; doi:10.3390/ani9080585)
Supplement: Supplementary file 1 [file animals-09-00585-s001.zip › S1 Horses enrolled and experimental data collected.xlsx]

## Sheet: CONTROLS
							flex_ day 0	flex_ day 59		fpass sens_ day 0	f pass sens_ day 59		f pass amp_ day 0	f pass amp_day 59
	Number	Breed	Age (years)	Sex	Attitude		Score	Score		Score	Score		Score	Score
	1	Connemara	16	Gelding	Cross country		2	0		2	0		0	0
	2	Selle Française	18	Gelding	Jumping		3	0.5		0	1		2	4
	3	Pony	13	Female	Cross country		2	1		0	0		3	3
	4	Pony	10	Gelding	Jumping		3	1.5		0	0		1	4
	5	Quarter Horse	4	Gelding	Reining		2.5	3		0	0		0	0
	6	Paint Horse	6	Gelding	Reining		0	0.5		0	0		0	2
	7	Quarter Horse	9	Gelding	Reining		0	0.5		0	0		0	0
	8	Paint Horse	8	Gelding	Reining		0.5	1.5		0	1		0	0
	9	Maremmano	5	Male	Reining		1	0		0	0		0	1
	10	Anglo Araba	7	Female	Jumping		6	6		0	0		0	0
	11	Sella Italiano	17	Gelding	Retired		5	0.5		1	4		1	4
	12	KWPN	13	Gelding	Jumping		3	0		2	0		0	0

## Sheet: 7 gr. BID
							flex_ day 0	flex_ day 59		fpass sens_ day 0	f pass sens_ day 59		f pass amp_ day 0	f pass amp_day 59
	Number	Breed	Age (years)	Sex	Attitude		Score	Score		Score	Score		Score	Score
	13	Selle Français	21	Gelding	Jumping		4	6		0	0		0	0
	14	Sella Italiana	17	Female	Jumping		2	2		0	0		1	2
	15	Selle Français	21	Male	Jumping		7	7		0	0		0	2
	16	Trotter	24	Gelding	Retired		0	0		0	0		0	2
	17	Thoroughbred	12	Gelding	Retired		0	0		0	0		0	4

## Sheet: 30 gr BID
							flex_day 0	flex_day 14	flex_day 30	flex_day 43	flex_day 59	flex_day 128		fpass sens_day 0	f pass sens_day 14	f pass sens_day 30	f pass sens_day 43	f pass sens_day 59	f pass sens_day 128		f pass amp_day 0	f pass amp_day 14	f pass amp_day 30	f pass amp_day 43	f pass amp_day 59	f pass amp_day 128
	Number	Breed	Age (years)	Sex	Attitude		Score	Score	Score	Score	Score	Score		Score	Score	Score	Score	Score	Score		Score	Score	Score	Score	Score	Score
	18	Warmblut	13	Female	Jumping		7	3	2	3.5	1.5	6		3	3	2	1	0	1		3	2	0	1	0	1
	19	Sella Italiana	18	Female	Jumping		6	1.5	1	1.5	1	3		4	3	1	0	0	3		3	0	1	0	2	1
	20	Selle Français	22	Gelding	Jumping		6	6	2	2.5	1.5	1.5		0	1	0	0	0	0		0	1	0	0	0	0
